# Supplementary material for: Metallic C5N monolayer as an efficient catalyst for accelerating redox kinetics of sulfur in lithium–sulfur batteries
Source: Royal Society of Chemistry journal article supplement (doi:10.1039/d1cp04192d), 2021-11-22
Supplement: d1cp04192d1.pdf [file d1cp04192d1.pdf]

## Supporting Information

# Metallic C<sub>5</sub>N Monolayer as Efficient Catalyst for Accelerating Redox Kinetics of Sulfur in Lithium-Sulfur Batteries

Zhihao Wang <sup>a,†</sup>, Zhihao Zeng <sup>a,†</sup>, Wei Nong <sup>a</sup>, Zhen Yang <sup>b</sup>, Chenze Qi <sup>b</sup>, Zhengping Qiao <sup>a,\*</sup>, Yan Li <sup>a,\*</sup> and Chengxin Wang <sup>a</sup>

<sup>a</sup> State key Laboratory of Optoelectronic Materials and Technologies, School of Materials Science and Engineering, Sun Yat-Sen (Zhongshan) University, Guangzhou 510275, People's Republic of China

<sup>b</sup> Zhejiang Key Laboratory of Alternative Technologies for Fine Chemicals Process, College of Chemistry and Chemical Engineering, Shaoxing University, Shaoxing, 312000, PR China

\* Corresponding Author. E-mail: cesqzp@mail.sysu.edu.cn (Zhengping Qiao)

\* Corresponding Author. E-mail: liyan266@mail.sysu.edu.cn (Yan Li)

† These authors contributed equally.

## Content

|                                  |    |
|----------------------------------|----|
| Note1.Computational details..... | 2  |
| Data1. For Section 3.1 .....     | 3  |
| Data2. For Section 3.2 .....     | 5  |
| Reference.....                   | 15 |

## Note1.Computational details

The adsorption energy ( $E_{ads}$ ) of adsorbates were obtained by following formula:

$$E_{ads} = E_{total} - E_{substrate} - E_{adsorbate} \quad (1)$$

where  $E_{total}$ ,  $E_{substrate}$  and  $E_{adsorbate}$  denoted the total energy of adsorbed system, substrate, and isolated adsorbate, respectively. Considering the definition, the lower the  $E_{ads}$ , the stronger the interaction between the substrate and adsorbate is.

The cohesive energy ( $E_{coh}$ ) of both phases  $C_5N$  is calculated by  $E_{coh} = (E_{C_5N} - 5E_C - E_N)/6$ , where  $E_{C_5N}$ ,  $E_C$  and  $E_N$  are the energy of  $C_5N$  per formula, energies of isolated C and N atoms, respectively, and 6 represents the total number of atoms in  $C_5N$  formula.

The Gibbs free energy of  $Li_2S_n$  and  $S_8$  are calculated by

$$G = E_{DFT} + E_{ZPE} - TS \quad (2)$$

where  $E_{DFT}$ ,  $E_{ZPE}$ , and  $S$  stand for the total energy obtained by DFT simulation, zero-point energy, and the entropy, respectively. The zero-point energies of LiPs and  $S_8$  cluster were obtained from vibrational frequency calculations and could be determined as  $ZPE = \frac{1}{2}\sum_i h\nu_i$ , here  $h$  and  $\nu_i$  are Planck constant and vibrational frequencies, respectively. T is the standard room temperature (298.15 K).

The elementary reaction steps for sulfur reduction[1] are considered as:

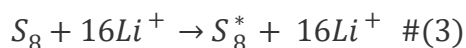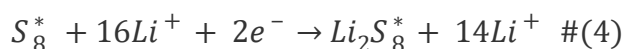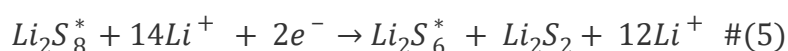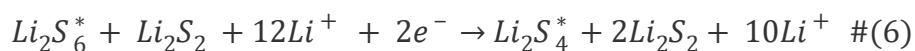

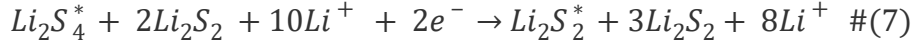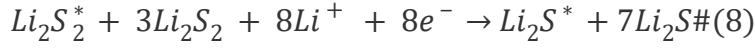

The energy of a single Li ion and an electron ( $Li^+ + e^-$ ) pair was treated as the energy of a single Li atom from its crystalline phase. The adsorbate with an asterisk “\*” refers to the state of being adsorbed, whereas the isolated state does not have a star mark.

Table S1. The k-meshes used for different types of calculations related to H-C<sub>5</sub>N.

| k-point        | structural relaxation | Self-consistent field | Density of states |
|----------------|-----------------------|-----------------------|-------------------|
| Primitive cell | 7×7×1                 | 11×11×1               | 13×13×1           |
| Super cell     | 2×2×1                 | 5×5×1                 | -                 |
| Nanoribbon     | 1×9×1                 | 1×15×1                | 1×15×1            |

Table S2. The k-meshes used for different types of calculations related to O-C<sub>5</sub>N.

| k-mesh         | structural relaxation | Self-consistent field | Density of states |
|----------------|-----------------------|-----------------------|-------------------|
| Primitive cell | 5×25×1                | 5×25×1                | 6×30×1            |
| Super cell     | 2×6×1                 | 3×9×1                 | -                 |
| Nanoribbon     | 6×1×1                 | 8×1×1                 | 10×1×1            |

### Data1. For Section 3.1

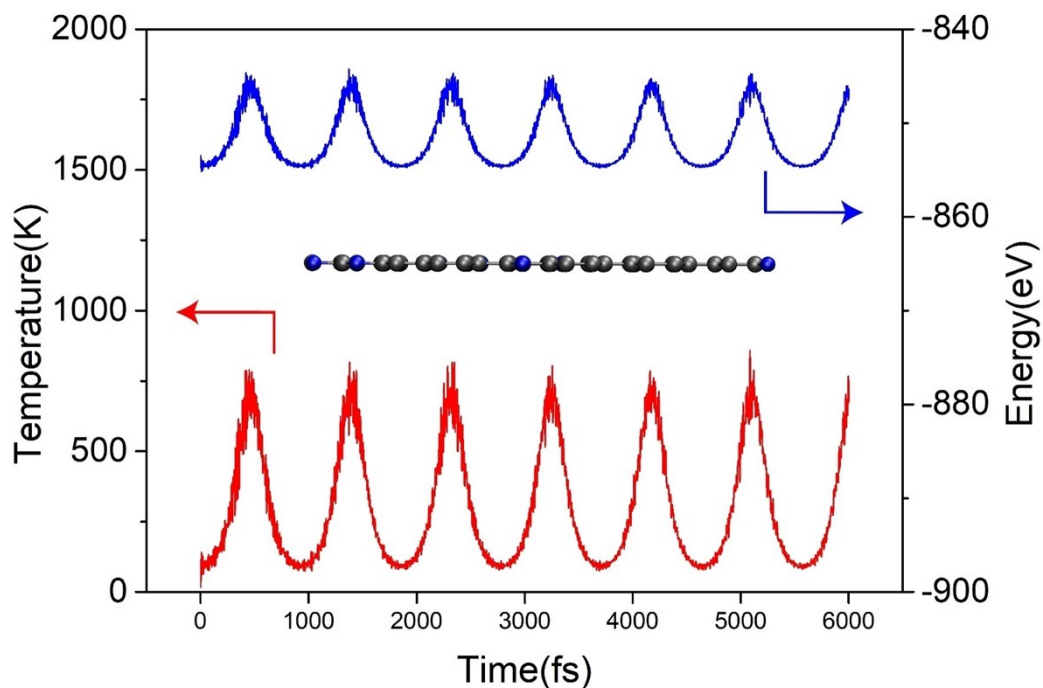

Fig. S1. Variations of temperature and energy against time for MD simulations of the H-C<sub>5</sub>N monolayer, and the inset shows the side view of the snapshot of the atomic configuration. The simulation is run at 300 K for 6 ps with a time step of 3 fs.

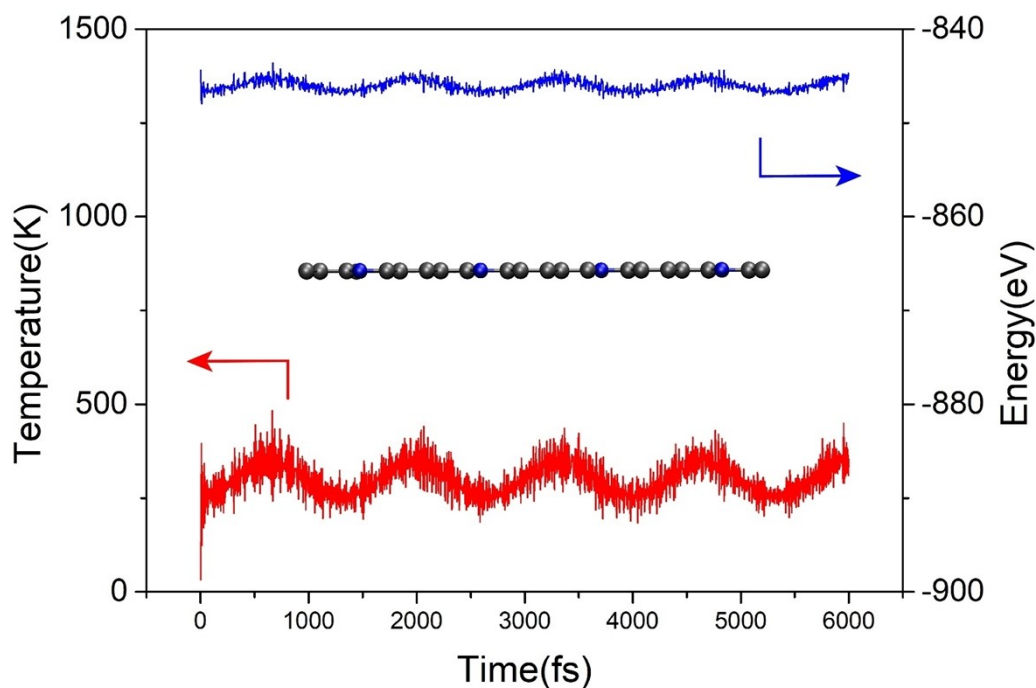

Fig. S2. Variations of temperature and energy against time for MD simulations of the O-C<sub>5</sub>N monolayer, and the inset shows the side view of the snapshot of the atomic configuration. The simulation is run at 300 K for 6 ps with a time step of 3 fs.

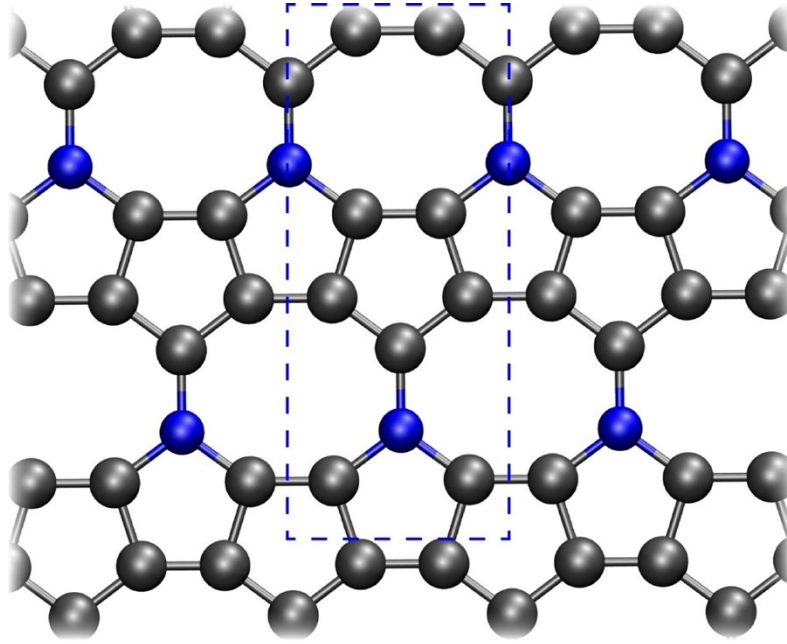

Fig. S3. Fully relaxed  $C_5N$  with another atomic arrangement from the literature[2]. Our simulation results give rise to the lattice constants of  $a = 3.66 \text{ \AA}$  and  $b = 8.88 \text{ \AA}$  and the cohesive energy of  $-7.20 \text{ eV}$  for this configuration, which are in accordance with the previous report.

Table S3. The charge transfers between adsorbates and O- $C_5N$ . The positive value means the charge transfer from adsorbates to O- $C_5N$  and the negative value represent the reverse direction of charge transfer.

| LiPs      | charge transfer/e |
|-----------|-------------------|
| $Li_2S$   | -1.147            |
| $Li_2S_2$ | 0.218             |
| $Li_2S_4$ | 0.027             |
| $Li_2S_6$ | 0.015             |
| $Li_2S_8$ | 0.008             |
| $S_8$     | -0.050            |

**Data2. For Section 3.2**

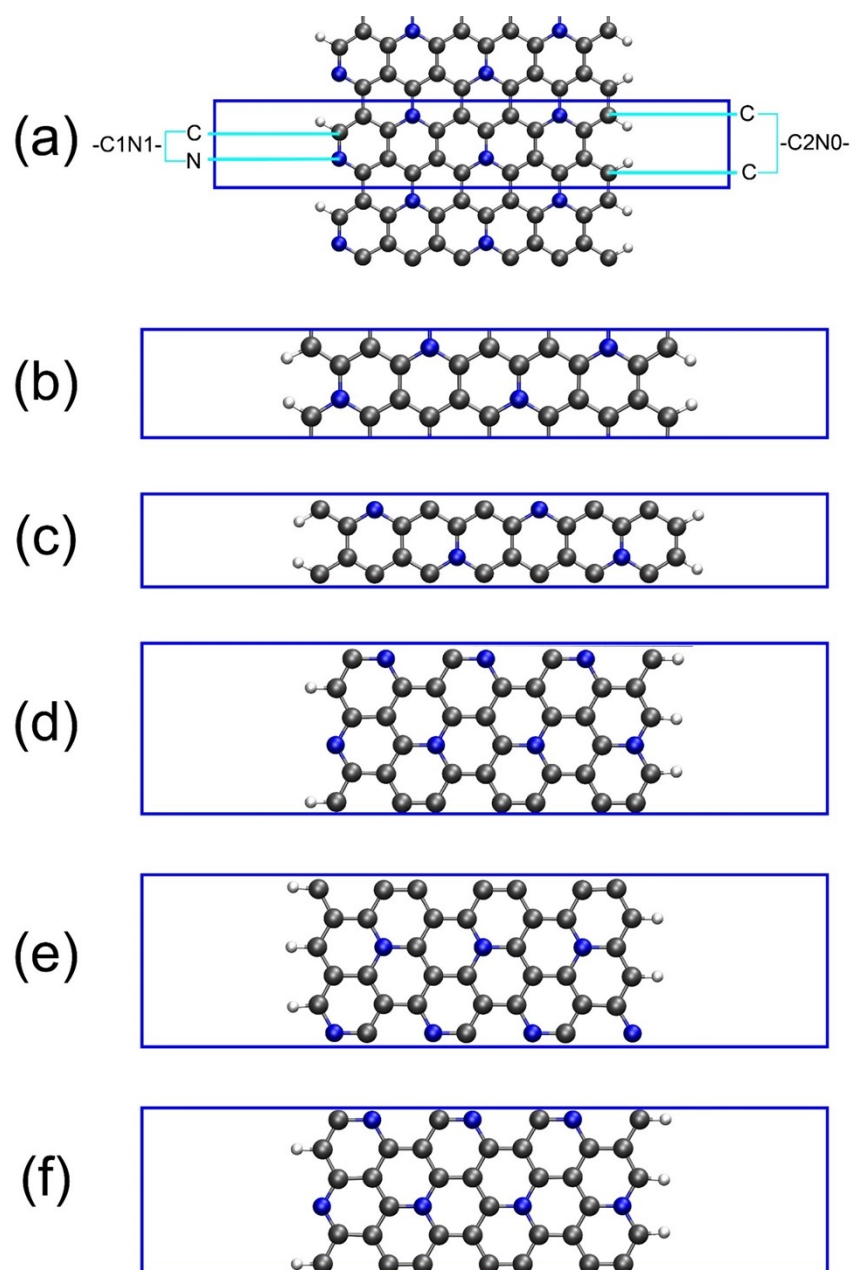

Fig. S4. Optimized structures of H-A-C1N1-C2N0 (a), H-A-C2N0-C2N0-1 (b), H-A-C2N0-C2N0-2 (c), H-Z-C2N1-C3N0-1 (d), H-Z-C3N0-C2N1 (e), H-Z-C2N1-C3N0-2 (f). We use -1/-2 to identify the two nanoribbons terminated with the same types of edge atoms but with different atomic arrangements. Taking H-A-C1N1-C2N0 (a) as example, it denotes the nanoribbon with armchair edges derived from H-C<sub>5</sub>N with successive edge atoms of one C atom and one N atom at the left side and two C atoms and single N atom at the right side of the ribbon, respectively. **In general, H-A- C<sub>m</sub>N<sub>n</sub>-C<sub>p</sub>N<sub>q</sub> (*m*, *n*, *p* and *q* = integer) denotes that there exist *m* C atoms and *n* N atoms at left side and *p* C atoms and *q* N atoms at right side of the ribbon with armchair edge obtained from the H-C<sub>5</sub>N.**

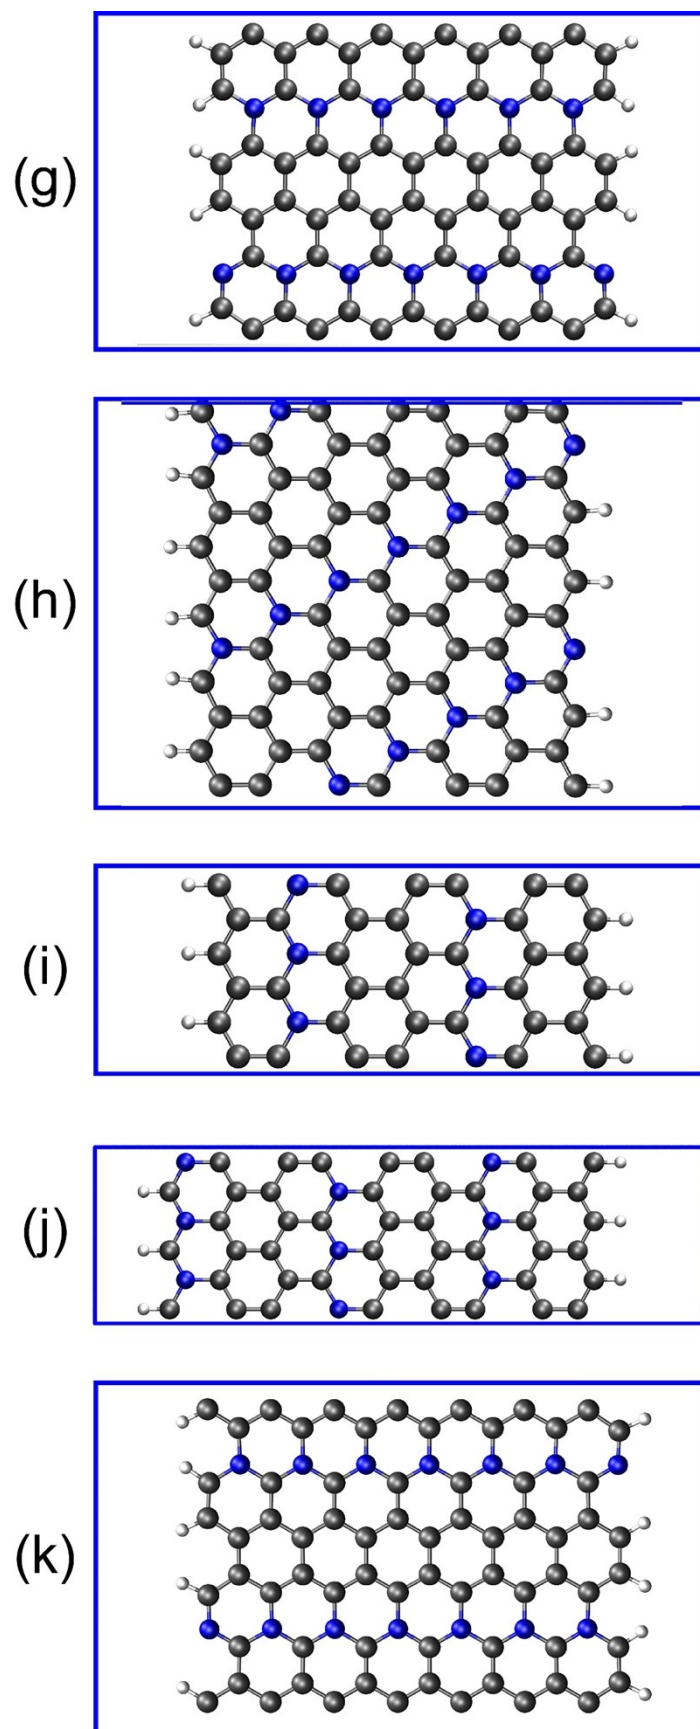

Fig. S5. Optimized structures of O-A-C5N1-C5N1-1 (g), O-Z-C6N0-C4N2 (h), O-Z-C3N0-C3N0-1 (i), O-Z-C3N0-C3N0-2 (j) and O-A-C5N1-C5N1-2 (k).



Table S4. Adsorption energies of  $\text{Li}_2\text{S}_6$  on different nanoribbons. Bolded  $CmNn$  present the situation that LiPs adsorb on that side of nanoribbon.

| Different Nanoribbon     | $E_{\text{ads}}/\text{eV}$ |
|--------------------------|----------------------------|
| H-A- <b>C2N0</b> -C2N0-1 | -0.64                      |
| H-A-C2N0- <b>C2N0</b> -1 | -0.76                      |
| H-A- <b>C2N0</b> -C2N0-2 | -0.83                      |
| H-A-C2N0- <b>C2N0</b> -2 | -0.81                      |
| H-Z- <b>C2N1</b> -C3N0-1 | -0.23                      |
| H-Z-C2N1- <b>C3N0</b> -1 | -0.22                      |
| H-Z- <b>C2N1</b> -C3N0-2 | -0.23                      |
| O-A-C5N1- <b>C5N1</b> -1 | -0.60                      |
| H-Z- <b>C3N0</b> -C2N1   | -0.21                      |
| H-Z-C3N0- <b>C2N1</b>    | -0.46                      |
| O-Z- <b>C6N0</b> -C4N2   | -0.39                      |
| O-Z-C6N0- <b>C4N2</b>    | -0.49                      |
| O-Z- <b>C3N0</b> -C3N0-1 | -0.71                      |
| O-Z-C3N0- <b>C3N0</b> -1 | -0.73                      |
| O-Z- <b>C3N0</b> -C3N0-2 | -0.87                      |
| O-Z-C3N0- <b>C3N0</b> -2 | -0.76                      |
| O-A- <b>C5N1</b> -C5N1-2 | -0.74                      |
| H-A- <b>C1N1</b> -C2N0   | <b>-1.03</b>               |
| H-A-C1N1- <b>C1N1</b>    | -1.07                      |
| O-Z-C2N0- <b>C0N2</b>    | -1.72                      |

Table S5. The variation in bond length ( $\Delta d$ ) and bond angle ( $\Delta A$ ) after LiPs adsorbed on O-Z-C2N0-**C0N2** nanoribbon. Herein, the variations are calculated as the difference between that of adsorbed LiPs and isolated LiPs. The subscripts, Li-S, S-S and Li-S-Li, in  $\Delta d_{\text{Li-S}}$ ,  $\Delta d_{\text{S-S}}$  and  $\Delta A_{\text{Li-S-Li}}$  stand for Li-S and S-S bonds as well as Li-S-Li angle in  $\text{Li}_2\text{S}$ , respectively.

| LiPs                    | $\Delta d_{\text{Li-S}}(\text{\AA})$ | $\Delta d_{\text{S-S}}(\text{\AA})$ | $\Delta A_{\text{Li-S-Li}}(^{\circ})$ |
|-------------------------|--------------------------------------|-------------------------------------|---------------------------------------|
| $\text{Li}_2\text{S}$   | 0.25                                 | -                                   | 44.34                                 |
| $\text{Li}_2\text{S}_2$ | 0.27                                 | 0.23                                | -                                     |
| $\text{Li}_2\text{S}_4$ | 0.16                                 | 0.04                                | -                                     |
| $\text{Li}_2\text{S}_6$ | -0.05                                | 0.01                                | -                                     |
| $\text{Li}_2\text{S}_8$ | 0.03                                 | 0.02                                | -                                     |
| $\text{S}_8$            | -                                    | 0.00                                | -                                     |

Table S6. The variations in bond length and bond angle after LiPs adsorbed on H-A-C1N1-C2N0.

| LiPs                           | $\Delta d_{\text{Li-S}}(\text{\AA})$ | $\Delta d_{\text{S-S}}(\text{\AA})$ | $\Delta A_{\text{Li-S-Li}}(^{\circ})$ |
|--------------------------------|--------------------------------------|-------------------------------------|---------------------------------------|
| Li <sub>2</sub> S              | 0.17                                 | -                                   | 13.37                                 |
| Li <sub>2</sub> S <sub>2</sub> | 0.02                                 | -0.10                               | -                                     |
| Li <sub>2</sub> S <sub>4</sub> | 0.12                                 | -0.01                               | -                                     |
| Li <sub>2</sub> S <sub>6</sub> | 0.00                                 | -0.01                               | -                                     |
| Li <sub>2</sub> S <sub>8</sub> | -0.02                                | 0.00                                | -                                     |
| S <sub>8</sub>                 | -                                    | 0.00                                | -                                     |

Table S7. The variations in bond length and bond angle after LiPs adsorbed on H-A-C1N1-C1N1.

| LiPs                           | $\Delta d_{\text{Li-S}}(\text{\AA})$ | $\Delta d_{\text{S-S}}(\text{\AA})$ | $\Delta A_{\text{Li-S-Li}}(^{\circ})$ |
|--------------------------------|--------------------------------------|-------------------------------------|---------------------------------------|
| Li <sub>2</sub> S              | 0.16                                 | -                                   | 9.41                                  |
| Li <sub>2</sub> S <sub>2</sub> | 0.08                                 | -0.11                               | -                                     |
| Li <sub>2</sub> S <sub>4</sub> | 0.12                                 | -0.01                               | -                                     |
| Li <sub>2</sub> S <sub>6</sub> | 0.10                                 | -0.01                               | -                                     |
| Li <sub>2</sub> S <sub>8</sub> | -0.03                                | -0.01                               | -                                     |
| S <sub>8</sub>                 | -                                    | 0.00                                | -                                     |

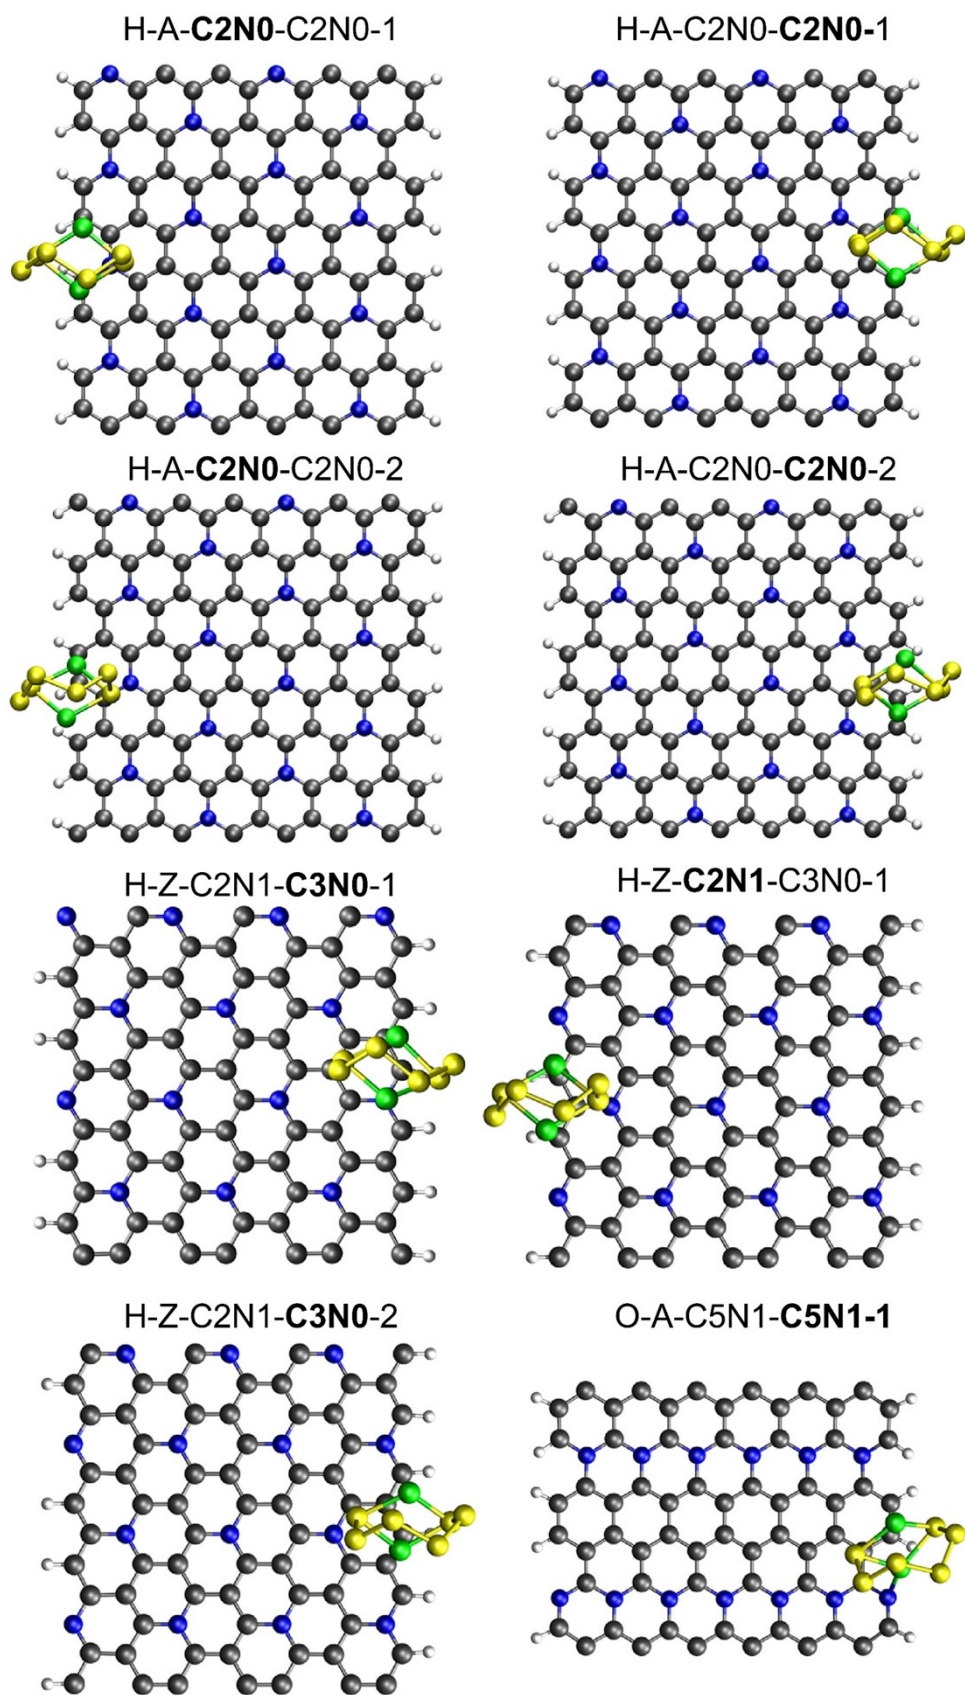

Fig. S6. Optimized structures of  $\text{Li}_2\text{S}_6$  adsorbed on the five kinds of nanoribbons.

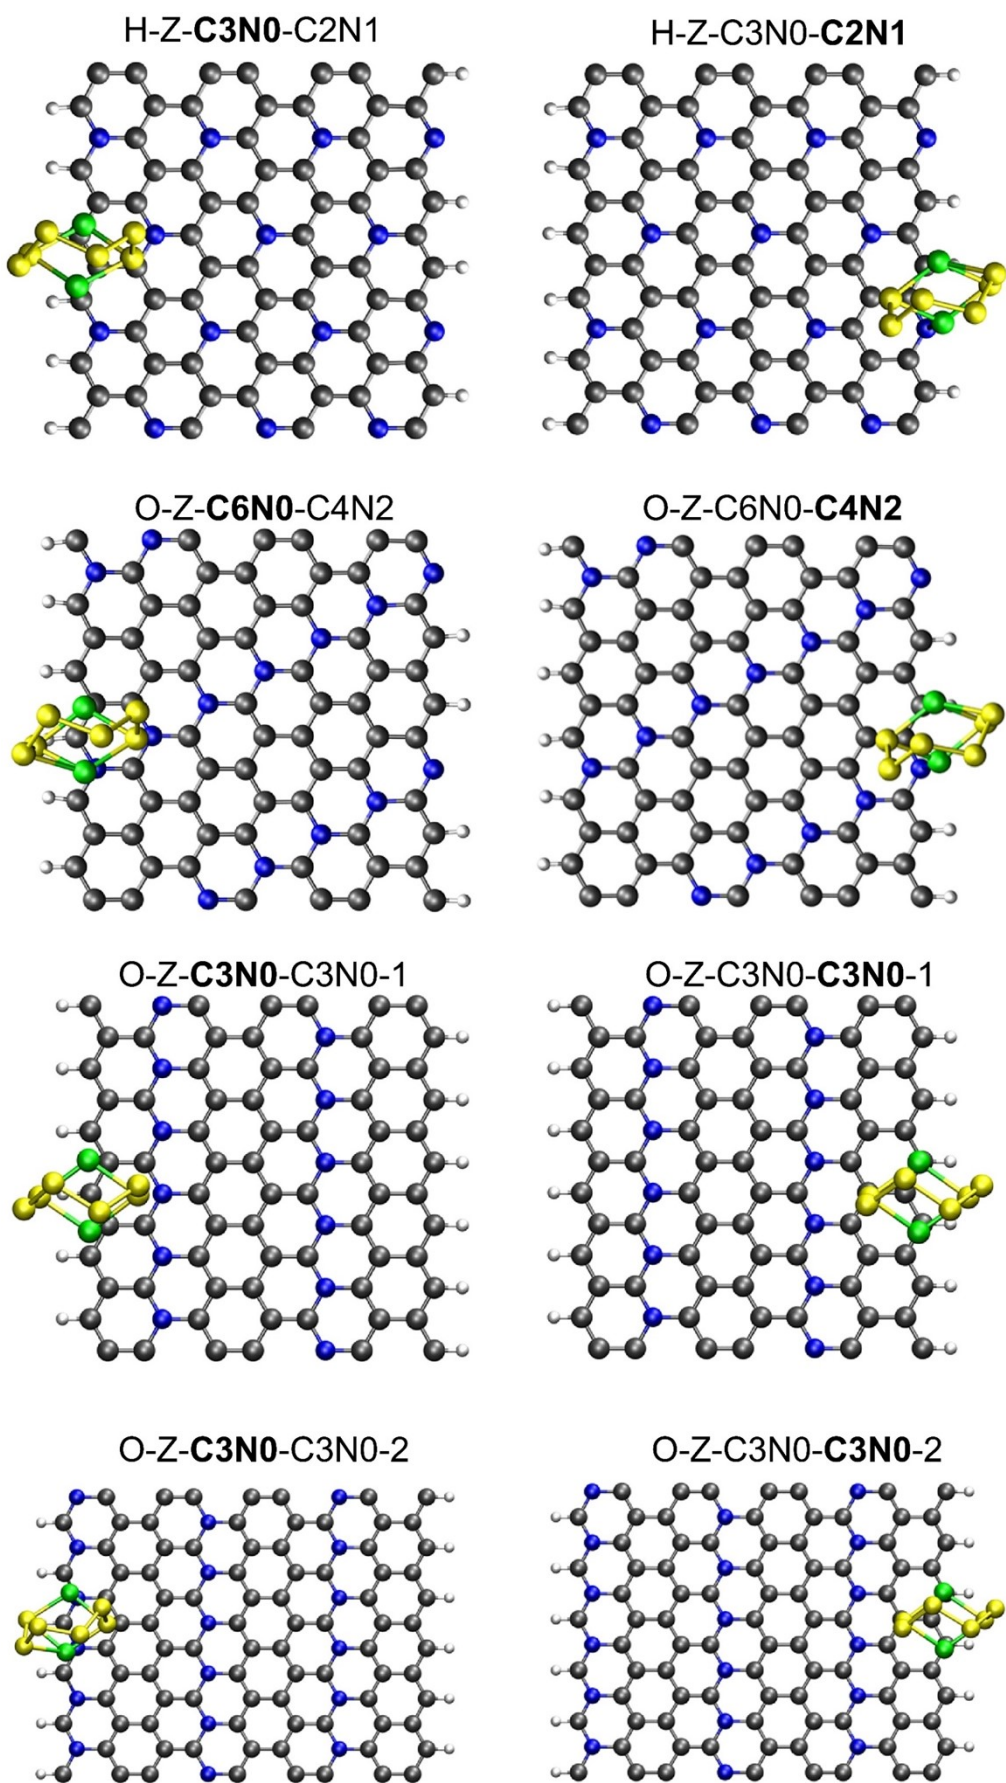

Fig. S7. Optimized structures of  $\text{Li}_2\text{S}_6$  adsorbed on the four kinds of nanoribbons.

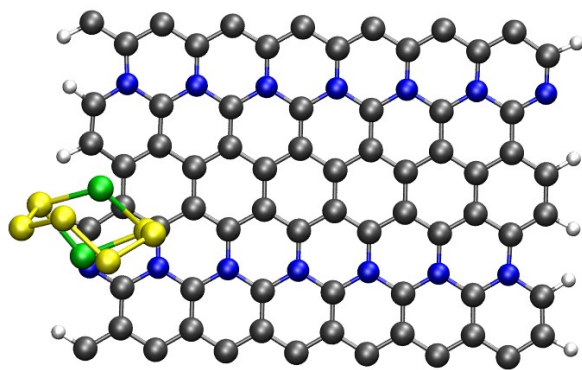

Fig. S8. Optimized structure of  $\text{Li}_2\text{S}_6$  adsorbed on the O-A-C5N1-C5N1-2 nanoribbon.

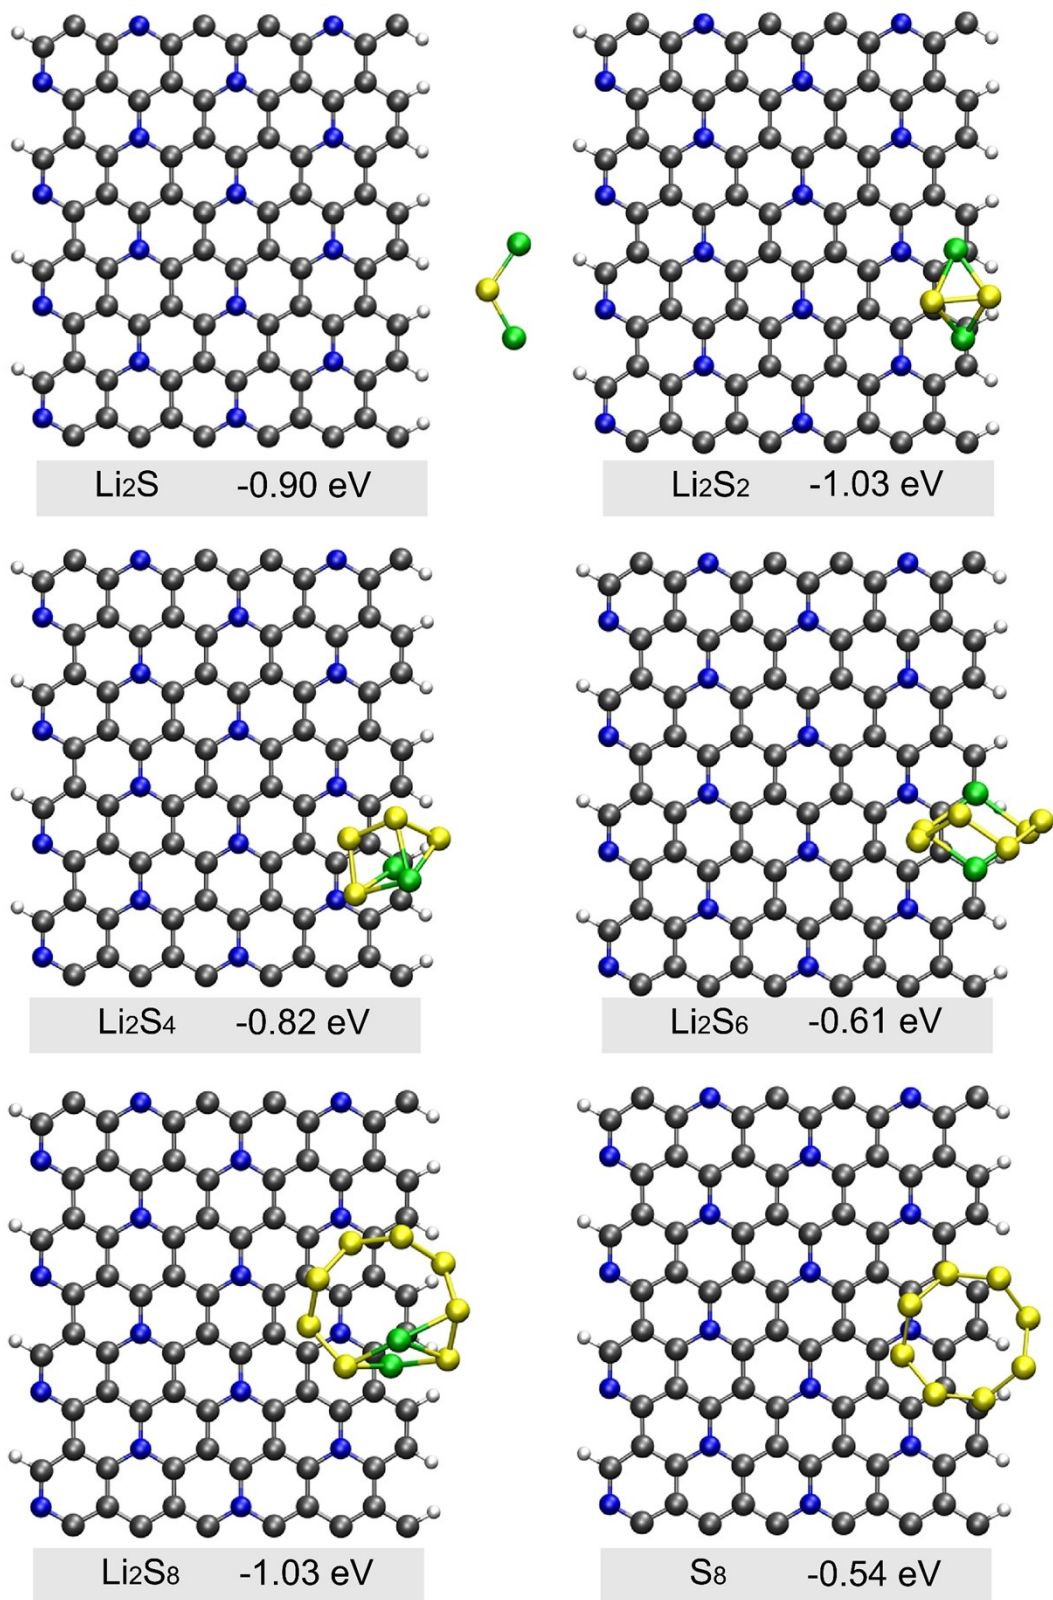

Fig. S9. Optimized structures of LiPs adsorbed on the H-A-C1N1-C2N0 nanoribbon, and corresponding  $E_{\text{ads}}$ .

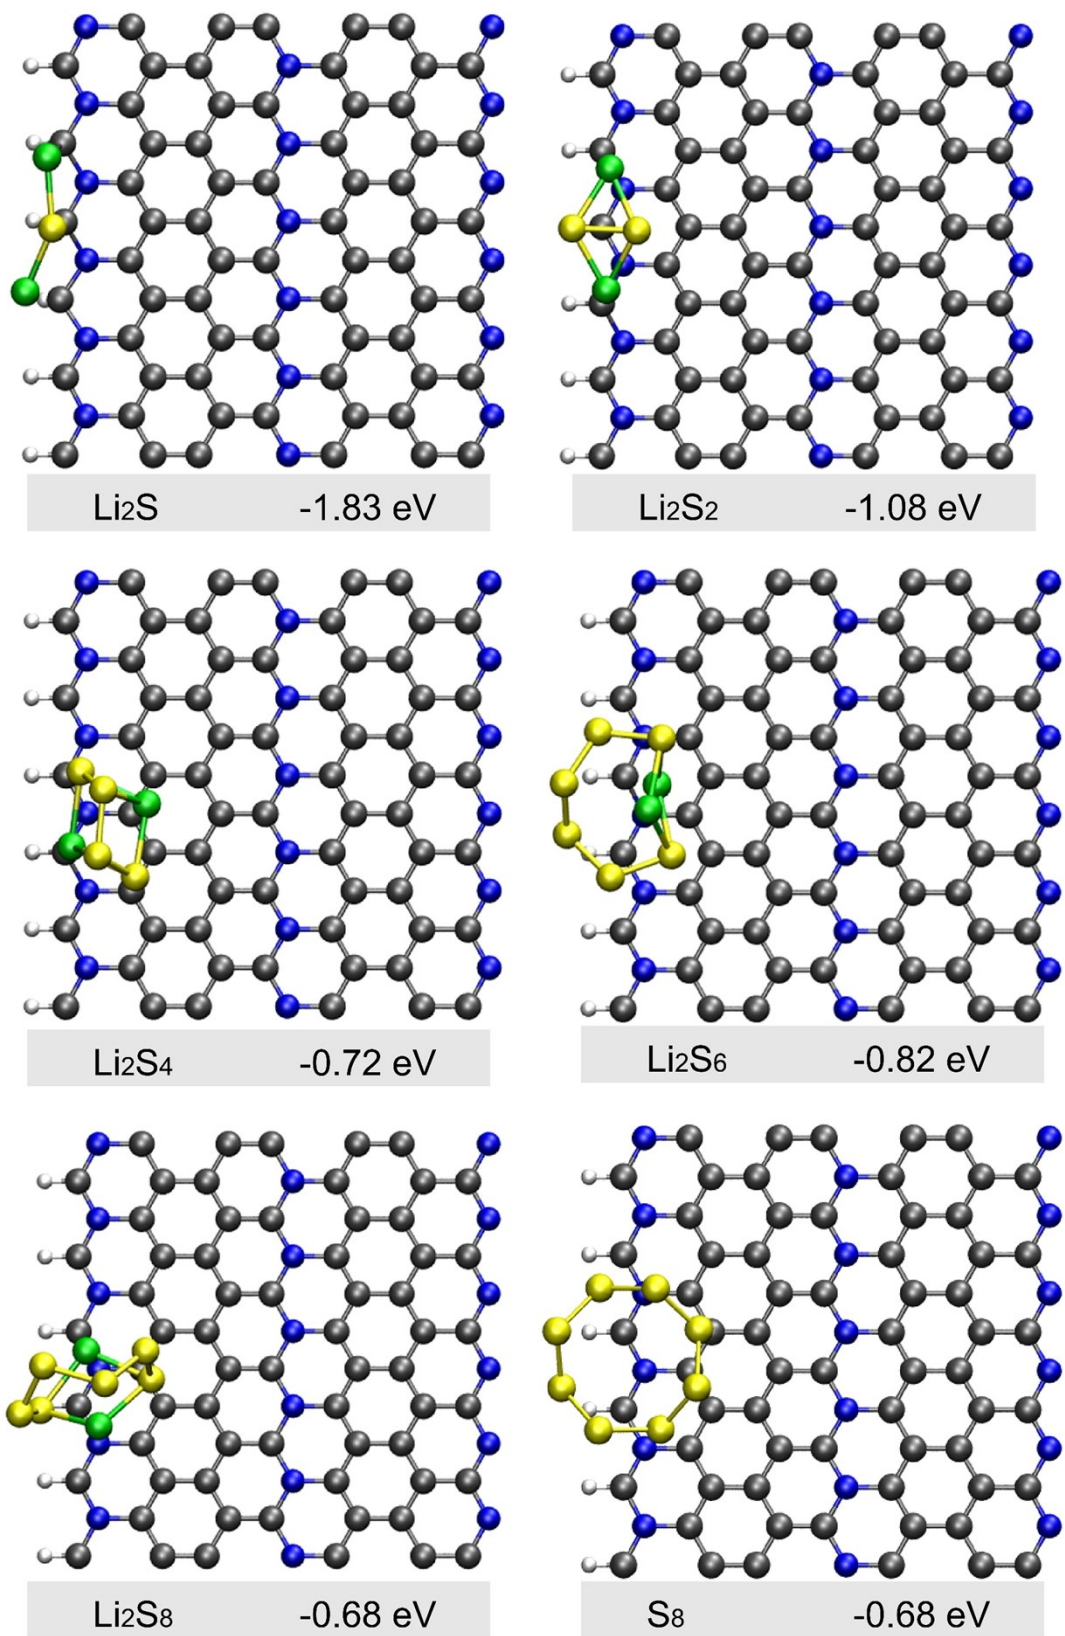

Fig. S10. Optimized structures of LiPs adsorbed on the O-Z-C2N0-C0N2 nanoribbon, and corresponding  $E_{\text{ads}}$ .

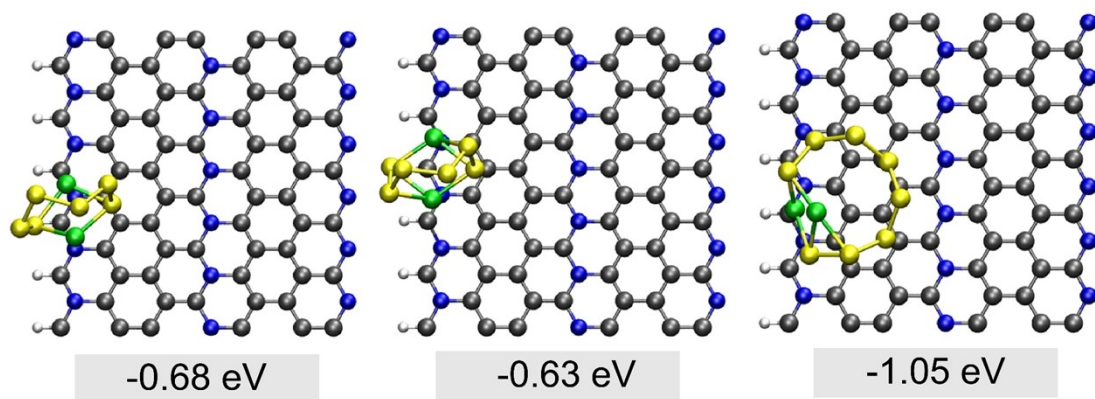

Fig. S11. Optimized structures of  $\text{Li}_2\text{S}_6$  adsorbed on the O-Z-C2N0-C0N2 nanoribbon, and corresponding  $E_{\text{ads}}$ .

## Reference

- [1] Q. He, B. Yu, H. Wang, M. Rana, X. Liao, and Y. Zhao, Oxygen defects boost polysulfides immobilization and catalytic conversion: First-principles computational characterization and experimental design, *Nano Res.* 13 (2020) 2299-2307.
- [2] D. Wang, H. Li, L. Zhang, Z. Sun, D. Han, L. Niu, and J. Zhao, 2D Nitrogen-Containing Carbon Material  $\text{C}_5\text{N}$  as Potential Host Material for Lithium Polysulfides: A First-Principles Study, *Adv. Theory Simul.* 2 (2018) 1800165-1800172.
